# Supplementary material for: Ex vivo culture of intestinal crypt organoids as a model system for assessing cell death induction in intestinal epithelial cells and enteropathy
Source: PubMed Central journal article supplement — Cell Death Dis. 2014 May 15;5(5):e1228–. doi: 10.1038/cddis.2014.183 (PMC4047863; doi:10.1038/cddis.2014.183), 2014-05-15
Supplement: cddis2014183x1.pdf [file cddis2014183x1.pdf]

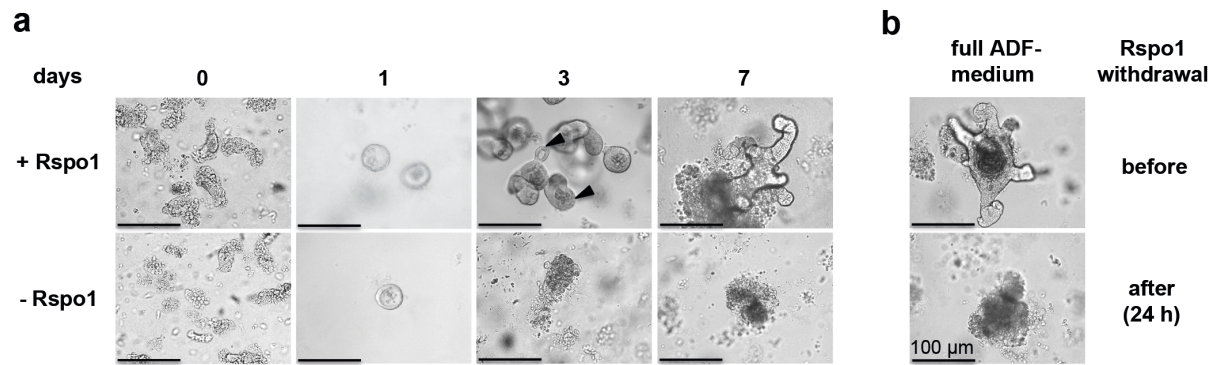

**Suppl. Fig. 1: Organoid growth and survival.** **a)** Small intestinal crypts were isolated, embedded into matrigel and cultured with either full ADF medium or the ADF medium lacking human R-Spondin-1 (-Rspo1). Development of the organoids was monitored during the next 7 days by light microscopy. Arrowheads: bud formations. Upper panel: development in complete ADF medium (+Rspo1), lower panel: development in medium without human R-spondin-1 (-Rspo1). **b)** Crypts were cultured for 6 days in full ADF medium. Then the medium was changed to ADF medium without R-spondin-1 for 24h (Rspo1 withdrawal). Scale bars indicate 100  $\mu$ m.
